# Supplementary material
Source: PubMed Central journal article supplement (PMC4156730)
Supplement: 1407344111_pnas.1407344111.sapp.pdf [file 1407344111_pnas.1407344111.sapp.pdf]

Fig. S1

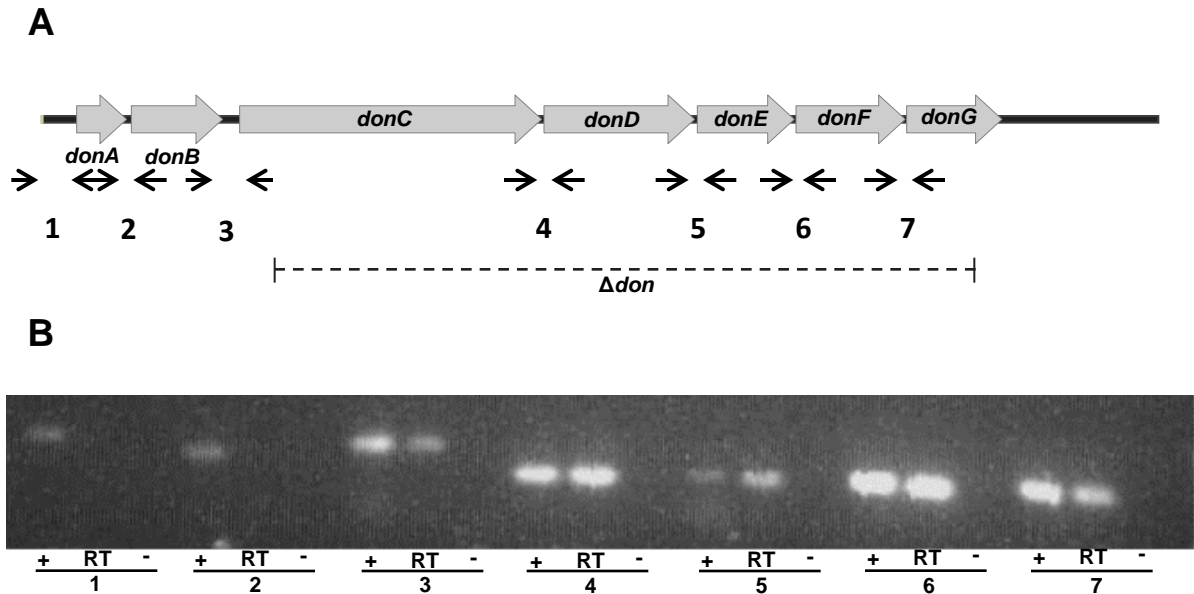

**Fig. S1.** Genetic map and RT-PCR analysis of the *donABCDEF G* genes (BF638R3437-43). **A)** Schematic diagram of the predicted *donABCDEF G* locus. The location of the  $\Delta don$  deletion is shown with the dashed line. *donAB* are regulatory genes coding an ECF sigma factor and antisigma factor respectively. *donC* and *donD* code for the SusC and SusD paralogues respectively. The *donEFG* genes code for an endo-S-like endo-N-acetyl- $\beta$ -D-glucosaminidase, a Concanavalin A lectin-like product with an  $\alpha$ -N-acetylglucosaminidase domain, and a protein with a DUF 1735 domain common to acylhydrolases respectively. **B)** Agarose gel visualization of RT-PCR products performed with oligonucleotide primers specific for each intergenic region of the *donABCDEF G* locus. RNA was isolated from mid-logarithmic phase cultures of IB101 grown in defined media with mucin glycans as the carbon/energy source. Arrows below the schematic in panel A indicate the relative positions of primers used to amplify each intergenic region. “+”, positive control using genomic DNA; “RT”, complete RT-PCR reaction containing reverse transcriptase; “-”, negative control with reverse transcriptase omitted.

The RT-PCR results show a strong signal and linkage between the *donCDEF G* genes. There also is a weaker linkage between the antisigma factor gene, *donB*, and *donC* which are separated by 182 bp. Although these two genes are linked, based on the microarray data and regulatory models for other PULs it is likely a second promoter is located upstream *donCDEF G* that would act to amplify the expression of these structural genes under inducing conditions. Regulation of this locus is currently under investigation.

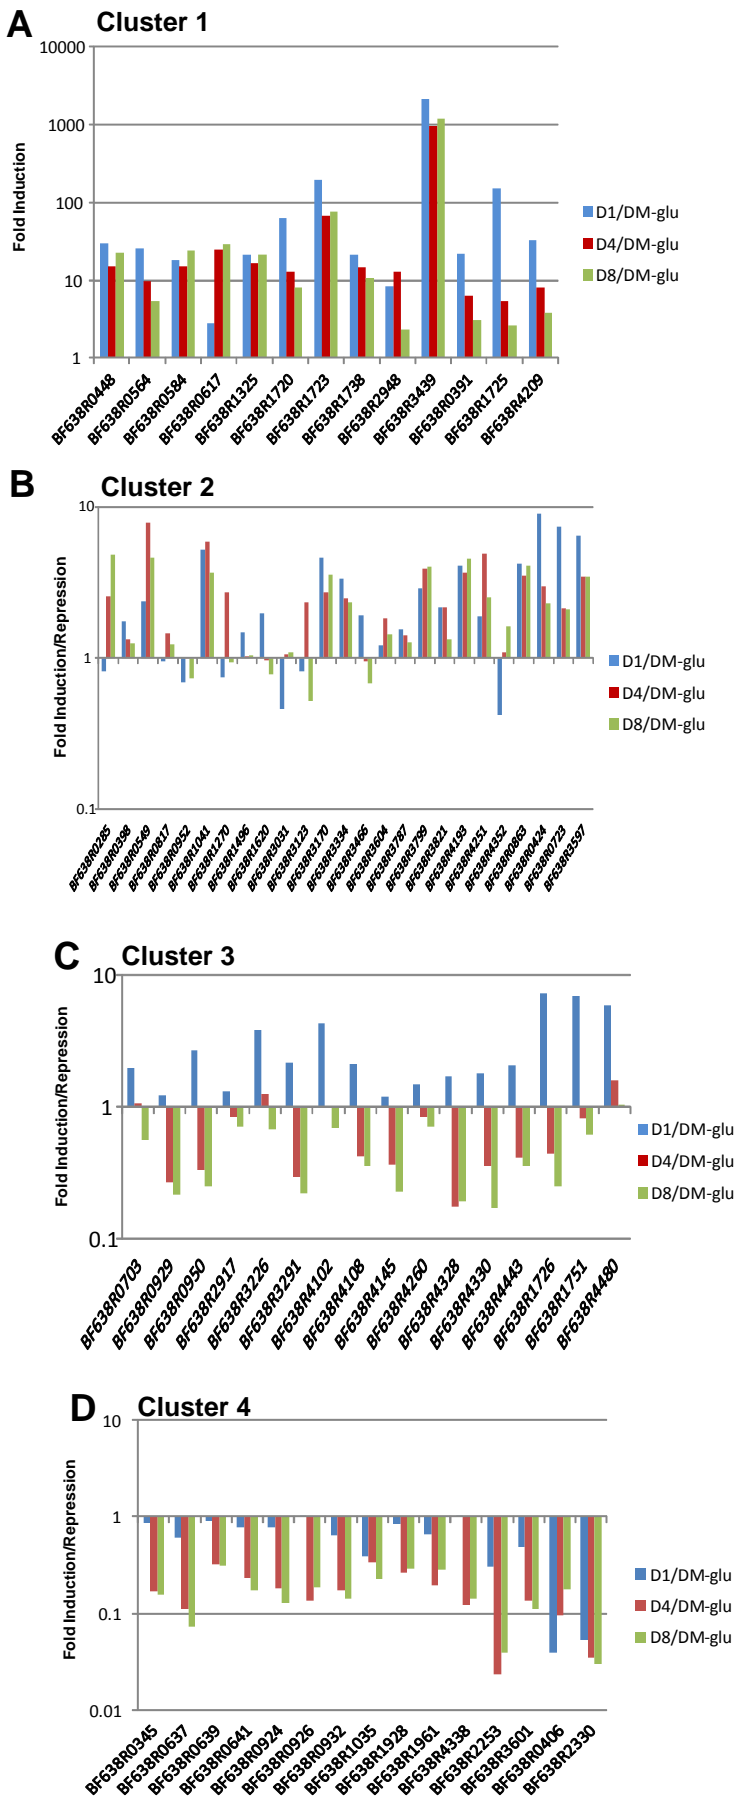

**Fig. S2.** Induction/repression patterns of SusC orthologues expressed during growth *in vivo*. Expression microarray data were used to determine induction or repression of all *susC*-like genes during growth of *B. fragilis* 638R in the rat tissue cage model relative to DM-glucose. Four induction patterns (Clusters) were identified by *k*-means clustering using the Standard Pearson's correlation coefficient distance metric. The four clusters are shown in panels A, B, C and D respectively. The fold-induction for *in vivo* growth relative to mid-logarithmic phase growth *in vitro* for 1, 4, and 8 days post-inoculation are shown by the blue, red, and green bars respectively.

Fig. S3

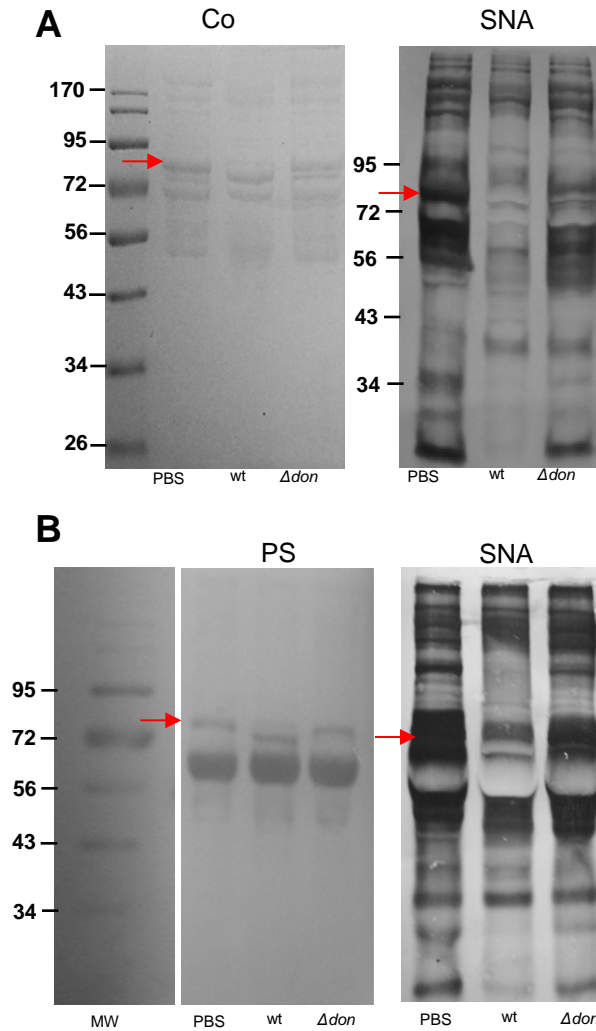

**Fig. S3.** Deglycosylation assays using total serous fluid proteins with serum albumin removed (**A**) or with serum albumin present (**B**). Standard deglycosylation analysis (SNA) was performed with wild type (wt) or  $\Delta don$  strains for 3 h. Samples were analyzed by SDS-PAGE followed by protein staining with either Coomassie blue staining (Co) or Ponceau S (PS) or glycan staining SNA lectin. The arrows indicate the transferrin bands. Serum albumin was removed with the Qproteome Murine Albumin Depletion Kit, (Qiagen, Inc.).

Fig. S4

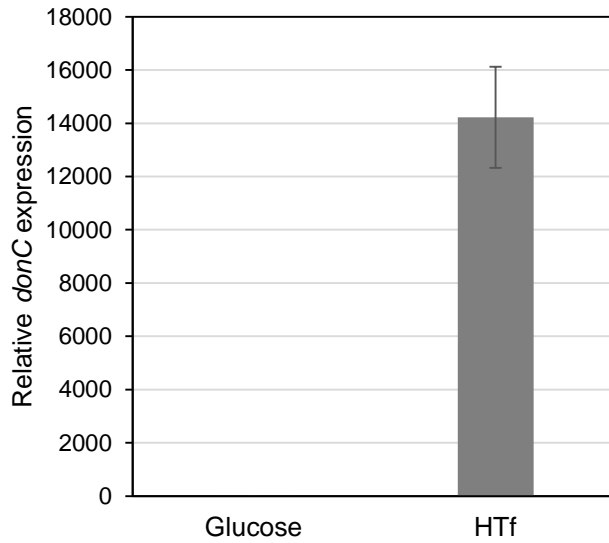

**Fig. S4.** DonC expression during growth in defined medium with human transferrin as the sole carbon/energy source. Expression of *donC* was determined by qRT-PCR for samples from mid-logarithmic cultures grown in DM-glucose (Glu) or DM-transferrin (HTf). The data were normalized to the amount of 16s RNA and the relative expression of transferrin grown cells to glucose grown cells was determined. The results are the average of triplicate samples.

Fig. S5

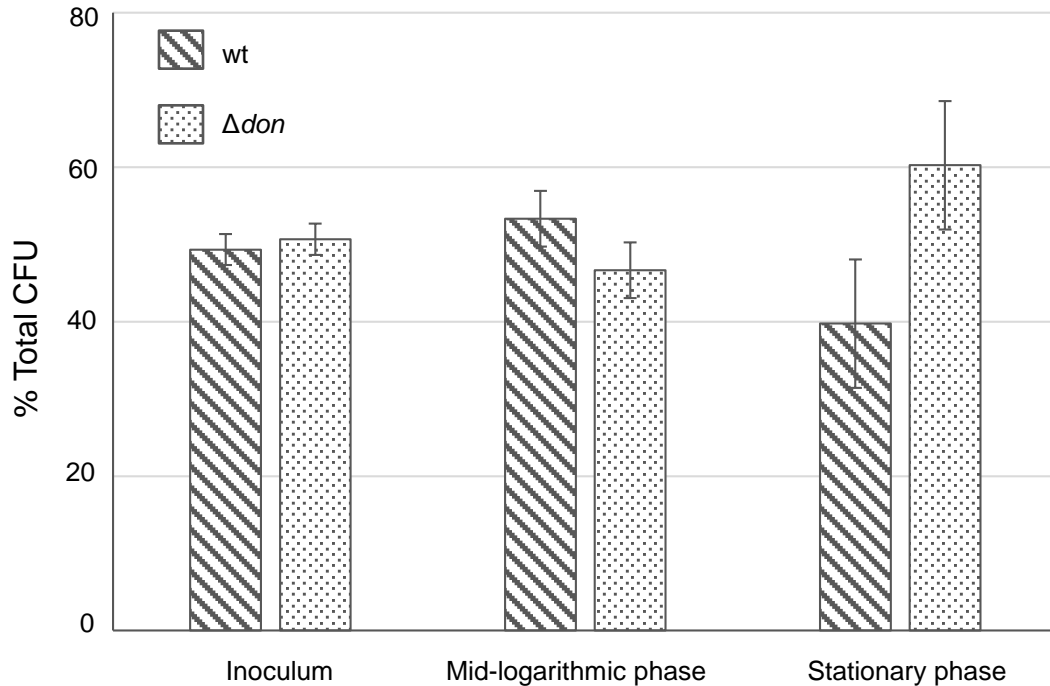

**Fig. S5.** *In vitro* competition assays in defined media with glucose. Mixtures containing a total of 4 ml of  $10^5$  CFU/ml of wild type and  $\Delta don$  cells in a 1:1 ratio were inoculated into 25 mL of defined media with glucose. Aliquots of the cell mixture were removed from the inoculum, mid-logarithmic phase cultures and the stationary phase of the cultures, diluted in PBS and plated on BHIS for total cell counts. The percentage of  $\Delta don$  among the total population was determined from the percentage of tetracycline resistant CFU counts among the total CFU counts.

Fig. S6

**A) DonE**

**B) DonF**

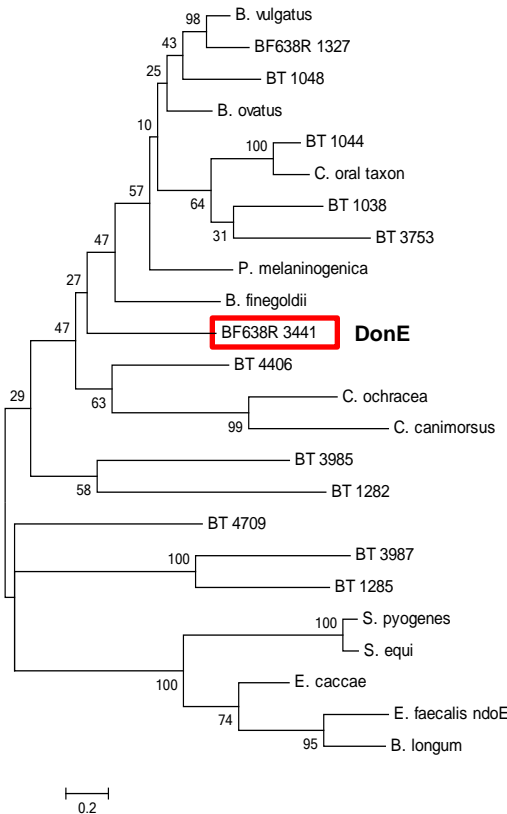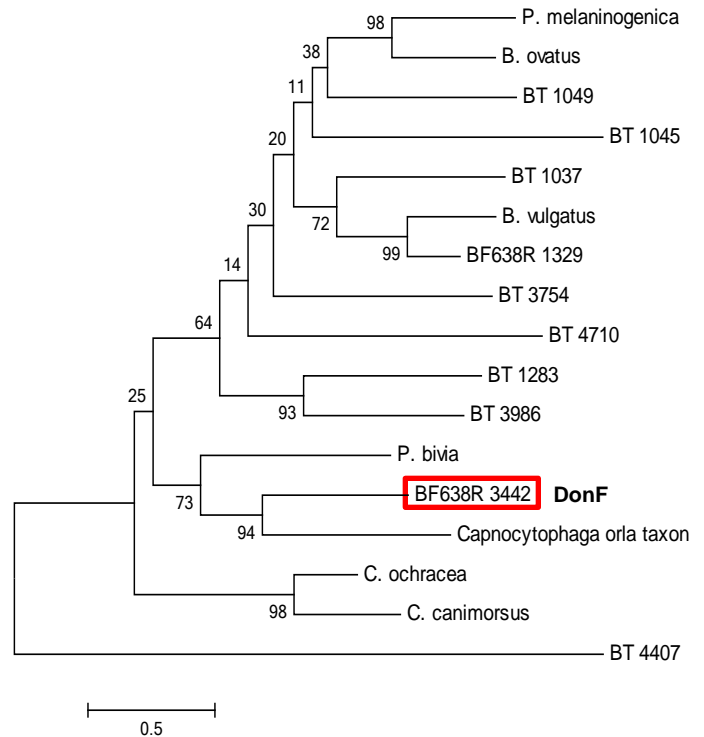

**Fig. S6.** Phylogenetic analysis of the *donE*, *F* and *G* gene products coding for an Endo-S-like endo-N-acetyl- $\beta$ -D-glucosaminidase, a Concanavalin A-like lectin/glucanase, and an uncharacterized sugar binding protein respectively. **A)** DonE (BF638R3441) **B)** DonF (BF638R3442) **C)** DonG (BF638R3443). The evolutionary trees were determined using the Maximum Likelihood method as implemented in the MEGA6 software. The trees with the highest likelihood are shown. Numbers at the branches are the percentage of trees in which the associated taxa clustered together. Initial trees were obtained by the Neighbor-Joining method. The trees are drawn to scale, with branch lengths measured in the number of substitutions per site. The protein sequences were obtained by using NCBI BLAST to identify similar sequences in the database. Most organisms are indicated by the species name. *B. thetaiotaomicron* (strain 5482) had many similar sequences and these were designated BT followed by the gene number.

Tamura K., Stecher G., Peterson D., Filipski A., and Kumar S. (2013). MEGA6: Molecular Evolutionary Genetics Analysis version 6.0. *Molecular Biology and Evolution* 30: 2725-2729.

Fig. S6 (continued)

**C) DonG**

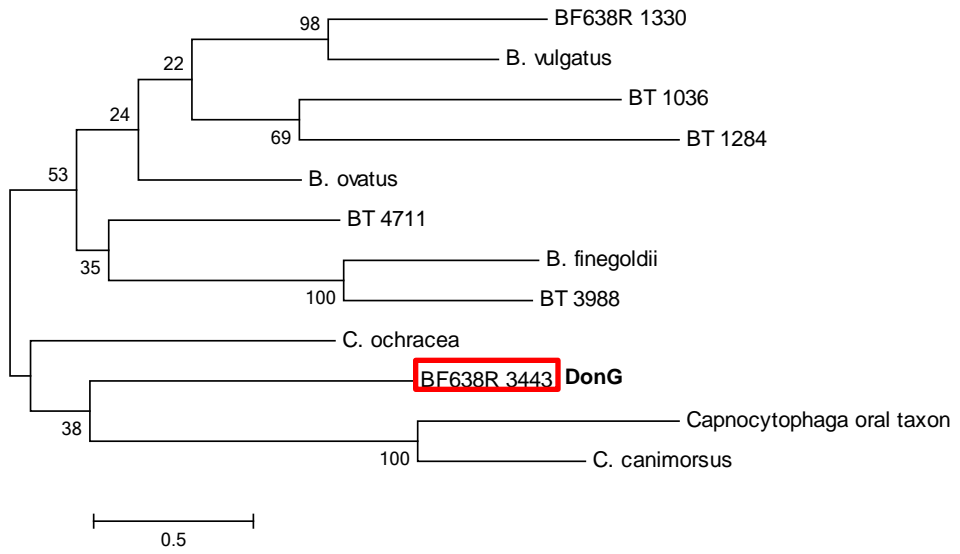

Fig. S7

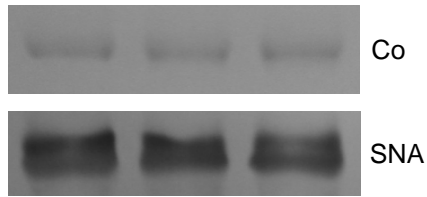

**Fig. S7.** Deglycosylation analysis of IgG. Deglycosylation assay of human IgG by *B. fragilis*. Commercially prepared human IgG was mixed and incubated anaerobically at 37°C for 3 h with PBS or wild type or  $\Delta don$  cells grown in an inducing DM-mucin glycan medium. Samples were analyzed by SDS-PAGE and subjected to Coomassie blue staining (Co) or SNA glycan-staining (SNA).



Fig. S8

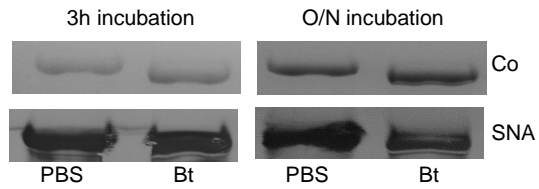

**Fig. S8.** Deglycosylation analysis of transferrin by *B. thetaiotaomicron* strain VPI5482. Commercially prepared human transferrin was incubated with PBS or wild type *B. thetaiotaomicron* cells (Bt) for 3 h or overnight (O/N) in standard deglycosylation assays. Cells used in the assays were grown to mid-logarithmic phase in DM-mucin glycan medium. Samples were analyzed by SDS-PAGE followed by Coomassie blue staining (Co) or SNA glycan staining (SNA).

Table S1. Induction and repression of *Bacteroides fragilis* BF638R PUL genes in vivo and in vitro.

| Gene       | FUNCTION                                 | *DM-M/DM-G | D1/DM-G | D4/DM-G | D8/DM-G |
|------------|------------------------------------------|------------|---------|---------|---------|
| BF638R0283 | exported alpha-galactosidase             | 0.84       | 0.90    | 1.70    | 2.85    |
| BF638R0284 | conserved hypothetical exported protein  | 0.84       | 0.60    | 1.28    | 2.08    |
| BF638R0285 | SusC-like                                | 0.61       | 0.82    | 2.58    | 4.84    |
| BF638R0286 | regulatory protein                       | 0.80       | 0.61    | 19.93   | 15.68   |
| BF638R0287 | ECF-type sigma factor                    | 1.10       | 0.74    | 0.83    | 1.09    |
| BF638R0288 | exported alpha-galactosidase             | 1.63       | 0.94    | 1.18    | 0.86    |
| BF638R0345 | SusC-like                                | 2.29       | 0.85    | 0.17    | 0.16    |
| BF638R0346 | lipoprotein                              | 1.96       | 0.70    | 0.38    | 0.34    |
| BF638R0347 | exported protein                         | 2.14       | 0.40    | 0.23    | 0.24    |
| BF638R0348 | exported protein                         | 2.18       | 0.91    | 1.03    | 0.75    |
| BF638R0349 | exported endo-arabinase                  | 0.79       | 0.69    | 0.75    | 0.65    |
| BF638R0384 | conserved hypothetical exported protein  | 1.99       | 1.61    | 0.40    | 0.33    |
| BF638R0385 | beta-galactosidase                       | 2.23       | 2.29    | 0.24    | 0.18    |
| BF638R0386 | exported beta-hexosaminidase             | 5.52       | 3.61    | 0.35    | 0.32    |
| BF638R0387 | conserved hypothetical exported protein  | 5.99       | 4.49    | 0.44    | 0.78    |
| BF638R0388 | exported hydrolase                       | 5.17       | 4.79    | 0.86    | 0.80    |
| BF638R0389 | conserved hypothetical protein           | 4.17       | 6.56    | 4.08    | 3.39    |
| BF638R0390 | exported protein                         | 20.14      | 12.38   | 4.37    | 3.01    |
| BF638R0391 | SusC-like                                | 37.20      | 21.85   | 6.25    | 3.07    |
| BF638R0392 | two-component system sensor histidine ki | 1.22       | 3.45    | 3.54    | 2.64    |
| BF638R0393 | two-component sensor histidine kinase    | 1.78       | 11.73   | 3.31    | 2.65    |
| BF638R0394 | conserved hypothetical exported protein  | 1.41       | 8.51    | 4.32    | 3.41    |
| BF638R0395 | conserved hypothetical exported protein  | 1.27       | 2.73    | 1.72    | 1.52    |
| BF638R0397 | exported protein                         | 1.28       | 1.92    | 1.39    | 1.40    |
| BF638R0398 | SusC-like                                | 1.22       | 1.74    | 1.33    | 1.26    |
| BF638R0406 | SusC-like                                | 0.03       | 0.04    | 0.10    | 0.18    |
| BF638R0407 | outer membrane protein                   | 0.06       | 0.10    | 0.21    | 0.30    |
| BF638R0421 | exported protein                         | 4.32       | 3.75    | 1.32    | 1.30    |
| BF638R0422 | exported protein                         | 5.70       | 4.33    | 1.56    | 1.23    |
| BF638R0423 | outer membrane protein                   | 10.43      | 6.80    | 1.52    | 1.50    |
| BF638R0424 | SusC-like                                | 15.08      | 8.96    | 2.96    | 2.29    |

|            |                                           |       |       |       |       |
|------------|-------------------------------------------|-------|-------|-------|-------|
| BF638R0425 | two-component system sensor histidine ki  | 1.82  | 16.18 | 2.42  | 2.01  |
| BF638R0444 | possible exported xanthan lyase/N-acetylm | 4.30  | 2.57  | 0.83  | 0.69  |
| BF638R0445 | cation symporter                          | 4.23  | 18.45 | 12.65 | 12.29 |
| BF638R0446 | conserved hypothetical exported protein   | 4.93  | 6.79  | 11.61 | 14.21 |
| BF638R0447 | conserved hypothetical lipoprotein        | 44.85 | 25.01 | 10.22 | 16.46 |
| BF638R0448 | SusC-like                                 | 55.44 | 30.24 | 14.86 | 22.53 |
| BF638R0546 | melibiase                                 | 1.65  | 0.86  | 1.79  | 1.94  |
| BF638R0547 | glycosyl hydrolase, alpha-xylosidase      | 2.40  | 0.86  | 0.91  | 0.89  |
| BF638R0548 | outer membrane protein                    | 2.16  | 0.99  | 1.19  | 0.85  |
| BF638R0549 | SusC-like                                 | 2.97  | 2.36  | 7.81  | 4.60  |
| BF638R0550 | anti-sigma factor                         | 1.40  | 0.73  | 18.21 | 6.61  |
| BF638R0551 | ECF-type RNA polymerase sigma factor      | 1.42  | 1.62  | 0.50  | 0.63  |
| BF638R0555 | ATP-binding component of ABC transporte   | 0.42  | 0.23  | 0.13  | 0.27  |
| BF638R0556 | ABC transporter                           | 0.47  | 0.32  | 0.25  | 0.51  |
| BF638R0564 | SusC-like                                 | 21.32 | 25.78 | 9.83  | 5.33  |
| BF638R0565 | conserved hypothetical protein            | 9.58  | 13.48 | 4.87  | 3.46  |
| BF638R0566 | arylsulfatase                             | 6.60  | 6.71  | 2.58  | 1.69  |
| BF638R0582 | RNA polymerase ECF sigma factor           | 0.91  | 0.66  | 0.92  | 1.08  |
| BF638R0583 | anti-sigma factor                         | 1.18  | 0.79  | 2.15  | 3.34  |
| BF638R0584 | SusC-like                                 | 3.30  | 18.29 | 14.87 | 23.79 |
| BF638R0585 | outer membrane protein                    | 2.65  | 8.11  | 8.98  | 14.03 |
| BF638R0586 | conserved hypothetical protein            | 2.50  | 5.69  | 4.39  | 6.85  |
| BF638R0614 | RNA polymerase ECF-type sigma factor      | 1.54  | 1.30  | 2.48  | 3.91  |
| BF638R0615 | anti-sigma factor                         | 1.33  | 0.43  | 1.62  | 1.24  |
| BF638R0616 | conserved hypothetical protein            | 1.32  | 1.77  | 6.72  | 6.50  |
| BF638R0617 | SusC-like                                 | 2.19  | 2.80  | 24.96 | 29.00 |
| BF638R0618 | outer membrane protein                    | 2.06  | 2.16  | 9.34  | 14.91 |
| BF638R0619 | beta-galactosidase                        | 1.44  | 0.71  | 1.71  | 3.31  |
| BF638R0620 | glycosyl hydrolase                        | 1.32  | 0.64  | 0.84  | 1.39  |
| BF638R0621 | glycosyl hydrolase/xylanase               | 1.30  | 0.83  | 0.86  | 1.32  |
| BF638R0636 | conserved hypothetical protein            | 0.52  | 0.64  | 0.12  | 0.08  |
| BF638R0637 | SusC-like                                 | 0.57  | 0.60  | 0.11  | 0.07  |
| BF638R0638 | membrane protein                          | 0.53  | 0.99  | 0.33  | 0.29  |
| BF638R0639 | SusC-like                                 | 0.58  | 0.91  | 0.32  | 0.31  |

|            |                                          |      |      |      |      |
|------------|------------------------------------------|------|------|------|------|
| BF638R0641 | SusC-like                                | 0.70 | 0.77 | 0.23 | 0.17 |
| BF638R0642 | lipoprotein                              | 0.65 | 0.85 | 0.30 | 0.23 |
| BF638R0643 | GTP-binding protein                      | 0.69 | 0.30 | 0.48 | 0.38 |
| BF638R0644 | conserved hypothetical protein           | 0.62 | 0.52 | 0.28 | 0.24 |
| BF638R0645 | aminopeptidase                           | 0.96 | 0.41 | 0.16 | 0.16 |
| BF638R0703 | SusC-like                                | 3.60 | 1.94 | 1.04 | 0.55 |
| BF638R0704 | conserved hypothetical protein           | 2.61 | 1.39 | 0.66 | 0.36 |
| BF638R0705 | conserved hypothetical exported protein  | 2.20 | 1.31 | 0.80 | 0.59 |
| BF638R0706 | conserved hypothetical exported protein  | 1.66 | 0.94 | 0.43 | 0.23 |
| BF638R0722 | conserved hypothetical lipoprotein       | 3.17 | 6.13 | 1.76 | 1.95 |
| BF638R0723 | SusC-like                                | 3.85 | 7.41 | 2.15 | 2.09 |
| BF638R0724 | alpha-1,2-mannosidase precursor          | 2.84 | 6.11 | 2.05 | 1.62 |
| BF638R0725 | alpha-1,2-mannosidase precursor          | 3.03 | 7.13 | 3.62 | 3.16 |
| BF638R0726 | anti-sigma factor                        | 0.77 | 2.23 | 3.46 | 4.25 |
| BF638R0727 | RNA polymerase ECF-type sigma factor     | 0.59 | 1.17 | 0.65 | 0.43 |
| BF638R0728 | alpha-1,2-mannosidase precursor          | 0.64 | 1.17 | 0.96 | 0.85 |
| BF638R0816 | glycosyl hydrolase                       | 1.68 | 0.74 | 2.88 | 3.75 |
| BF638R0817 | SusC-like                                | 1.96 | 0.96 | 1.47 | 1.24 |
| BF638R0818 | outer membrane protein                   | 1.13 | 0.69 | 1.06 | 0.83 |
| BF638R0819 | lipoprotein                              | 1.08 | 0.51 | 1.00 | 0.97 |
| BF638R0858 | secreted sulfatase                       | 1.50 | 2.38 | 0.31 | 0.26 |
| BF638R0859 | possible alpha-galactosidase             | 1.34 | 2.98 | 0.32 | 0.24 |
| BF638R0860 | conserved hypothetical protein           | 2.02 | 2.38 | 0.66 | 0.43 |
| BF638R0861 | sulfatase                                | 4.55 | 2.10 | 2.88 | 2.00 |
| BF638R0862 | conserved hypothetical protein           | 3.68 | 3.97 | 3.52 | 4.19 |
| BF638R0863 | SusC-like                                | 4.95 | 4.21 | 3.53 | 4.12 |
| BF638R0864 | two-component system sensor histidine ki | 0.99 | 0.87 | 0.57 | 0.43 |
| BF638R0920 | beta-glucosidase                         | 4.59 | 1.69 | 1.59 | 1.37 |
| BF638R0921 | cytochrome c binding protein             | 2.95 | 0.71 | 0.47 | 0.40 |
| BF638R0922 | transmembrane protein                    | 2.41 | 3.45 | 1.04 | 0.81 |
| BF638R0923 | outer membrane protein                   | 6.39 | 1.63 | 0.80 | 0.62 |
| BF638R0924 | SusC-like                                | 7.44 | 0.78 | 0.18 | 0.13 |
| BF638R0925 | conserved hypothetical protein           | 1.14 | 1.45 | 0.32 | 0.38 |
| BF638R0926 | SusC-like                                | 1.16 | 1.01 | 0.14 | 0.18 |

|            |                                           |       |      |       |      |
|------------|-------------------------------------------|-------|------|-------|------|
| BF638R0927 | possible outer membrane protein           | 2.34  | 1.34 | 0.31  | 0.37 |
| BF638R0929 | SusC-like                                 | 2.80  | 1.21 | 0.27  | 0.22 |
| BF638R0930 | RNA polymerase ECF-type sigma factor      | 0.62  | 0.58 | 0.52  | 0.63 |
| BF638R0931 | anti-sigma factor                         | 5.77  | 0.82 | 11.63 | 6.73 |
| BF638R0932 | SusC-like                                 | 3.68  | 0.64 | 0.17  | 0.14 |
| BF638R0933 | possible outer membrane protein           | 3.76  | 0.66 | 0.40  | 0.33 |
| BF638R0949 | conserved hypothetical protein            | 3.16  | 2.27 | 0.54  | 0.35 |
| BF638R0950 | SusC-like                                 | 4.16  | 2.69 | 0.33  | 0.25 |
| BF638R0951 | conserved hypothetical protein            | 1.43  | 0.82 | 1.04  | 1.61 |
| BF638R0952 | SusC-like                                 | 2.06  | 0.69 | 1.01  | 0.74 |
| BF638R1032 | RNA polymerase ECF-type sigma factor      | 0.80  | 1.33 | 2.93  | 2.41 |
| BF638R1033 | anti-sigma factor                         | 1.65  | 1.13 | 5.94  | 3.39 |
| BF638R1035 | SusC-like                                 | 1.12  | 0.39 | 0.34  | 0.23 |
| BF638R1036 | conserved hypothetical protein            | 1.10  | 0.37 | 0.12  | 0.10 |
| BF638R1037 | endonuclease/exonuclease/phosphatase f    | 1.25  | 0.47 | 0.18  | 0.16 |
| BF638R1038 | exported protein                          | 1.93  | 0.39 | 0.32  | 0.37 |
| BF638R1039 | RNA polymerase ECF-type sigma factor      | 1.47  | 1.12 | 3.34  | 2.11 |
| BF638R1040 | anti-sigma factor                         | 7.58  | 0.94 | 15.74 | 9.82 |
| BF638R1041 | SusC-like                                 | 29.69 | 5.19 | 5.89  | 3.69 |
| BF638R1042 | outer membrane protein                    | 18.88 | 3.83 | 3.75  | 2.63 |
| BF638R1043 | arylsulfatase precursor                   | 14.97 | 4.08 | 4.27  | 2.98 |
| BF638R1045 | arylsulfatase                             | 1.77  | 0.48 | 1.58  | 1.74 |
| BF638R1264 | alpha-glucosidase, glycosylhydrolase      | 2.19  | 1.49 | 1.18  | 1.11 |
| BF638R1265 | ECF-type RNA polymerase sigma factor      | 1.17  | 0.34 | 0.22  | 0.23 |
| BF638R1266 | xylosidase/arabinosidase                  | 2.18  | 0.16 | 0.33  | 0.39 |
| BF638R1267 | beta-lactamase                            | 0.73  | 0.49 | 0.68  | 1.14 |
| BF638R1268 | hypothetical protein                      | 0.80  | 0.46 | 0.60  | 0.53 |
| BF638R1269 | anti-sigma factor                         | 0.56  | 0.39 | 3.33  | 2.04 |
| BF638R1270 | SusC-like                                 | 0.79  | 0.74 | 2.71  | 0.93 |
| BF638R1271 | conserved hypothetical protein            | 0.77  | 0.68 | 1.24  | 0.51 |
| BF638R1272 | phosphohydrolase, lcc family              | 1.14  | 1.23 | 1.33  | 1.24 |
| BF638R1273 | possible phosphodiesterase/nucleotide pyr | 1.67  | 0.51 | 1.08  | 0.87 |
| BF638R1274 | endonuclease/exonuclease/phosphatase f    | 1.94  | 0.62 | 0.43  | 0.37 |
| BF638R1323 | RNA polymerase ECF-type sigma factor      | 0.76  | 2.33 | 5.17  | 7.21 |

|            |                                            |       |        |       |       |
|------------|--------------------------------------------|-------|--------|-------|-------|
| BF638R1324 | anti-sigma factor                          | 2.00  | 2.03   | 13.65 | 13.92 |
| BF638R1325 | SusC-like                                  | 20.82 | 21.43  | 16.60 | 20.89 |
| BF638R1326 | conserved hypothetical protein             | 20.04 | 17.86  | 12.88 | 17.23 |
| BF638R1327 | possible endo-beta-N-acetylglucosaminidas  | 19.35 | 17.54  | 11.15 | 16.70 |
| BF638R1329 | conserved hypothetical protein             | 20.68 | 15.05  | 9.62  | 13.49 |
| BF638R1330 | conserved hypothetical protein             | 13.81 | 13.37  | 8.34  | 10.29 |
| BF638R1494 | RNA polymerase ECF-type sigma factor       | 1.07  | 7.96   | 6.75  | 13.31 |
| BF638R1495 | anti-sigma factor                          | 1.20  | 1.83   | 11.32 | 4.29  |
| BF638R1496 | SusC-like                                  | 1.07  | 1.47   | 1.04  | 1.05  |
| BF638R1497 | outer membrane protein                     | 0.88  | 0.54   | 0.37  | 0.34  |
| BF638R1498 | hypothetical protein                       | 0.96  | 1.08   | 0.97  | 0.79  |
| BF638R1499 | alpha-galactosidase                        | 1.03  | 1.68   | 0.99  | 1.04  |
| BF638R1620 | SusC-like                                  | 1.14  | 1.99   | 0.97  | 0.79  |
| BF638R1621 | conserved hypothetical protein             | 1.25  | 3.01   | 1.24  | 1.05  |
| BF638R1715 | NanR, ROK family transcriptional regulator | 1.40  | 2.42   | 3.22  | 3.16  |
| BF638R1716 | NanL, NANA aldolase                        | 4.30  | 16.33  | 7.74  | 6.73  |
| BF638R1717 | NanE, N-acetylglucosamine 2-epimerase      | 5.01  | 26.95  | 9.11  | 8.42  |
| BF638R1718 | NanT, transport protein                    | 9.54  | 64.83  | 15.77 | 13.94 |
| BF638R1719 | hypothetical protein                       | 5.86  | 43.75  | 8.59  | 9.89  |
| BF638R1720 | SusC-like                                  | 5.94  | 62.69  | 12.81 | 8.02  |
| BF638R1721 | conserved hypothetical protein             | 5.43  | 74.43  | 16.70 | 11.68 |
| BF638R1722 | conserved hypothetical protein             | 21.28 | 188.38 | 63.00 | 75.48 |
| BF638R1723 | SusC-like                                  | 47.55 | 195.37 | 67.18 | 76.87 |
| BF638R1724 | conserved hypothetical protein             | 13.49 | 163.55 | 7.43  | 4.49  |
| BF638R1725 | SusC-like                                  | 16.81 | 152.89 | 5.42  | 2.61  |
| BF638R1726 | SusC-like                                  | 3.38  | 7.18   | 0.44  | 0.25  |
| BF638R1727 | exported protein                           | 2.52  | 7.96   | 0.71  | 0.52  |
| BF638R1728 | NanH, neuraminidase precursor              | 9.81  | 37.60  | 12.63 | 12.98 |
| BF638R1729 | NahA, beta-N-acetylhexoosaminidase         | 19.66 | 128.60 | 15.90 | 15.22 |
| BF638R1730 | sialate-O-acetyltransferase                | 11.99 | 75.34  | 4.85  | 7.61  |
| BF638R1731 | sialate O-acetylesterase                   | 2.60  | 3.43   | 1.19  | 1.28  |
| BF638R1732 | beta-mannosidase                           | 1.38  | 1.84   | 0.45  | 0.61  |
| BF638R1733 | beta-N-acetylhexosaminidase                | 1.63  | 2.12   | 0.42  | 0.48  |
| BF638R1734 | lipoprotein                                | 1.29  | 2.37   | 0.27  | 0.40  |

|            |                                           |       |       |       |       |
|------------|-------------------------------------------|-------|-------|-------|-------|
| BF638R1735 | beta-N-acetylhexosaminidase               | 1.28  | 1.18  | 0.52  | 0.43  |
| BF638R1736 | outer membrane protein                    | 1.09  | 1.27  | 0.37  | 0.38  |
| BF638R1737 | beta-galactosidase                        | 0.99  | 1.32  | 0.43  | 0.50  |
| BF638R1738 | SusC-like                                 | 6.81  | 21.16 | 14.41 | 10.74 |
| BF638R1739 | conserved hypothetical protein            | 5.40  | 6.36  | 3.37  | 1.96  |
| BF638R1740 | outer membrane protein                    | 4.59  | 3.95  | 2.57  | 2.02  |
| BF638R1751 | SusC-like                                 | 23.68 | 6.85  | 0.81  | 0.62  |
| BF638R1752 | outer membrane protein                    | 19.34 | 6.23  | 0.68  | 0.67  |
| BF638R1753 | alpha-1,2-mannosidase precursor           | 13.55 | 3.03  | 1.06  | 1.28  |
| BF638R1754 | endonuclease/exonuclease/phosphatase f    | 4.03  | 1.65  | 0.55  | 0.58  |
| BF638R1755 | Alkaline phosphatase                      | 2.41  | 0.70  | 0.23  | 0.24  |
| BF638R1756 | conserved hypothetical protein            | 2.22  | 1.03  | 0.29  | 0.29  |
| BF638R1757 | exported protein                          | 2.47  | 0.71  | 0.21  | 0.21  |
| BF638R1758 | exported protein                          | 1.83  | 0.92  | 0.23  | 0.18  |
| BF638R1928 | SusC-like                                 | 1.01  | 0.85  | 0.26  | 0.29  |
| BF638R1929 | conserved hypothetical protein            | 1.01  | 1.10  | 0.32  | 0.36  |
| BF638R1960 | TonB-dependent outer membrane recepto     | 0.53  | 0.31  | 0.44  | 0.39  |
| BF638R1961 | SusC-like                                 | 0.34  | 0.65  | 0.19  | 0.28  |
| BF638R1962 | conserved hypothetical protein            | 0.32  | 0.42  | 0.09  | 0.15  |
| BF638R1963 | conserved hypothetical protein            | 0.33  | 0.34  | 0.06  | 0.07  |
| BF638R1964 | hypothetical protein                      | 0.33  | 0.42  | 0.06  | 0.10  |
| BF638R1965 | hypothetical protein                      | 0.37  | 0.54  | 0.09  | 0.14  |
| BF638R1966 | hypothetical protein                      | 0.43  | 0.59  | 0.14  | 0.17  |
| BF638R1967 | conserved hypothetical protein            | 0.42  | 0.46  | 0.10  | 0.14  |
| BF638R1968 | conserved hypothetical protein            | 0.46  | 0.51  | 0.07  | 0.09  |
| BF638R1969 | polysialic acid capsule transport protein | 0.52  | 0.82  | 0.16  | 0.21  |
| BF638R2253 | SusC-like                                 | 0.13  | 0.31  | 0.02  | 0.04  |
| BF638R2254 | lipoprotein                               | 0.15  | 0.28  | 0.04  | 0.07  |
| BF638R2329 | lipoprotein                               | 0.07  | 0.08  | 0.06  | 0.07  |
| BF638R2330 | SusC-like                                 | 0.07  | 0.05  | 0.03  | 0.03  |
| BF638R2916 | conserved hypothetical protein            | 2.63  | 1.04  | 0.73  | 0.95  |
| BF638R2917 | SusC-like                                 | 3.23  | 1.30  | 0.83  | 0.70  |
| BF638R2918 | membrane protein                          | 3.26  | 0.78  | 1.83  | 1.64  |
| BF638R2920 | ECF sigma factor                          | 1.90  | 3.73  | 13.53 | 10.60 |

|            |                                    |        |         |        |         |
|------------|------------------------------------|--------|---------|--------|---------|
| BF638R2946 | exported protein                   | 15.80  | 3.53    | 8.07   | 1.32    |
| BF638R2947 | membrane protein                   | 18.11  | 3.53    | 7.19   | 1.50    |
| BF638R2948 | SusC-like                          | 34.43  | 8.37    | 12.90  | 2.29    |
| BF638R2949 | conserved hypothetical protein     | 15.35  | 1.25    | 12.24  | 3.46    |
| BF638R3029 | carbon-nitrogen hydrolase          | 0.64   | 1.25    | 1.39   | 0.97    |
| BF638R3030 | exported protein                   | 0.39   | 1.59    | 1.85   | 0.87    |
| BF638R3031 | SusC-like                          | 0.37   | 0.46    | 1.07   | 1.09    |
| BF638R3032 | exported protein                   | 0.50   | 0.21    | 0.40   | 0.53    |
| BF638R3033 | exported protein                   | 0.67   | 0.77    | 1.70   | 1.00    |
| BF638R3120 | sulfatase                          | 1.48   | 0.63    | 0.39   | 0.24    |
| BF638R3121 | exported hydrolase                 | 1.64   | 0.50    | 0.60   | 0.33    |
| BF638R3122 | lipoprotein                        | 1.47   | 0.34    | 0.59   | 0.24    |
| BF638R3123 | SusC-like                          | 1.20   | 0.82    | 2.34   | 0.52    |
| BF638R3124 | anti-sigma factor                  | 1.81   | 1.40    | 3.64   | 2.52    |
| BF638R3125 | sigma factor                       | 1.15   | 1.73    | 0.78   | 1.22    |
| BF638R3167 | conserved hypothetical lipoprotein | 8.14   | 7.10    | 2.76   | 4.31    |
| BF638R3168 | lipoprotein                        | 2.90   | 3.23    | 1.60   | 2.29    |
| BF638R3169 | membrane protein                   | 4.07   | 3.93    | 1.86   | 3.07    |
| BF638R3170 | SusC-like                          | 4.23   | 4.61    | 2.72   | 3.57    |
| BF638R3226 | SusC-like                          | 5.03   | 3.82    | 1.24   | 0.67    |
| BF638R3227 | lipoprotein                        | 3.44   | 3.90    | 1.43   | 0.81    |
| BF638R3228 | lipoprotein                        | 3.73   | 5.26    | 3.18   | 2.70    |
| BF638R3290 | exported protein                   | 7.72   | 1.67    | 0.27   | 0.20    |
| BF638R3291 | SusC-like                          | 8.76   | 2.17    | 0.29   | 0.22    |
| BF638R3331 | hypothetical protein               | 0.90   | 0.56    | 0.27   | 0.32    |
| BF638R3332 | lipoprotein                        | 1.08   | 0.42    | 0.53   | 0.44    |
| BF638R3333 | exported protein                   | 3.34   | 2.11    | 1.27   | 0.87    |
| BF638R3334 | SusC-like                          | 5.06   | 3.38    | 2.48   | 2.34    |
| BF638R3437 | donA, ECF sigma factor             | 3.60   | 23.33   | 14.85  | 22.79   |
| BF638R3438 | donB, antisigma factor             | 33.84  | 223.63  | 597.79 | 532.11  |
| BF638R3439 | donC, SusC-like                    | 559.54 | 2146.72 | 933.46 | 1161.15 |
| BF638R3440 | donD, SusD-like                    | 505.26 | 1907.71 | 700.53 | 918.12  |
| BF638R3441 | donE, endo-S-like                  | 334.26 | 1494.32 | 443.63 | 631.07  |
| BF638R3442 | donF, lectin-like                  | 233.61 | 765.28  | 367.94 | 438.35  |



|            |                                              |       |         |        |        |
|------------|----------------------------------------------|-------|---------|--------|--------|
| BF638R3443 | donG, exported protein                       | 90.69 | 1227.85 | 235.37 | 363.24 |
| BF638R3466 | SusC-like                                    | 0.50  | 1.92    | 0.96   | 0.68   |
| BF638R3467 | conserved hypothetical protein               | 0.50  | 1.90    | 0.28   | 0.38   |
| BF638R3468 | lipoprotein                                  | 0.51  | 0.82    | 0.08   | 0.12   |
| BF638R3469 | peptidase                                    | 0.51  | 0.88    | 0.10   | 0.10   |
| BF638R3470 | hypothetical protein                         | 0.41  | 0.70    | 0.12   | 0.15   |
| BF638R3593 | exported phosphatase                         | 1.48  | 1.37    | 1.03   | 1.13   |
| BF638R3594 | exported protein                             | 1.69  | 0.99    | 0.49   | 0.38   |
| BF638R3595 | exported phosphoesterase protein             | 1.81  | 0.89    | 0.72   | 0.48   |
| BF638R3596 | conserved hypothetical protein               | 6.21  | 4.97    | 3.34   | 3.16   |
| BF638R3597 | SusC-like                                    | 7.16  | 6.41    | 3.45   | 3.47   |
| BF638R3598 | anti sigma factor                            | 2.46  | 1.60    | 17.35  | 14.63  |
| BF638R3599 | RNA polymerase sigma factor                  | 1.76  | 1.46    | 0.82   | 0.69   |
| BF638R3600 | lipoprotein                                  | 8.64  | 0.67    | 0.20   | 0.15   |
| BF638R3601 | SusC-like                                    | 9.98  | 0.49    | 0.14   | 0.11   |
| BF638R3602 | conserved hypothetical protein               | 6.63  | 0.82    | 1.21   | 1.83   |
| BF638R3603 | membrane protein                             | 10.52 | 0.87    | 1.31   | 1.01   |
| BF638R3604 | SusC-like                                    | 17.96 | 1.22    | 1.82   | 1.44   |
| BF638R3605 | regulatory protein (possible anti-sigma fact | 5.53  | 0.74    | 10.18  | 7.99   |
| BF638R3606 | RNA polymerase sigma factor                  | 0.87  | 0.49    | 0.83   | 1.81   |
| BF638R3783 | transport related, membrane protein          | 2.67  | 1.65    | 1.55   | 1.22   |
| BF638R3784 | sialidase                                    | 3.29  | 1.67    | 0.67   | 0.60   |
| BF638R3785 | hypothetical protein                         | 3.64  | 2.55    | 2.00   | 1.42   |
| BF638R3786 | lipoprotein                                  | 2.56  | 1.55    | 1.31   | 1.32   |
| BF638R3787 | SusC-like                                    | 2.70  | 1.54    | 1.41   | 1.28   |
| BF638R3788 | N-acetylneuraminase lyase (sialic acid lyase | 1.90  | 2.57    | 1.51   | 1.69   |
| BF638R3789 | GntR-family regulatory protein               | 1.29  | 0.38    | 1.12   | 1.22   |
| BF638R3796 | exported sulfatase                           | 1.59  | 0.76    | 1.08   | 0.84   |
| BF638R3797 | exported uslfatase                           | 2.21  | 1.11    | 1.20   | 0.82   |
| BF638R3798 | conserved hypothetical protein               | 2.31  | 1.70    | 2.66   | 2.92   |
| BF638R3799 | SusC-like                                    | 2.99  | 2.90    | 3.90   | 4.01   |
| BF638R3800 | membrane protein                             | 1.37  | 0.66    | 15.37  | 9.87   |
| BF638R3801 | RNA polymerase sigma factor                  | 0.59  | 2.08    | 3.20   | 4.32   |
| BF638R3819 | RNA polymerase sigma factor                  | 1.95  | 2.42    | 3.01   | 3.69   |

|            |                                         |       |       |       |       |
|------------|-----------------------------------------|-------|-------|-------|-------|
| BF638R3820 | membrane protein                        | 4.68  | 4.53  | 12.17 | 6.41  |
| BF638R3821 | SusC-like                               | 2.13  | 2.18  | 2.17  | 1.33  |
| BF638R3822 | lipoprotein                             | 1.80  | 0.94  | 0.60  | 0.35  |
| BF638R3823 | lipoprotein                             | 0.95  | 1.39  | 1.07  | 0.74  |
| BF638R3824 | exported protein                        | 0.08  | 0.12  | 0.07  | 0.06  |
| BF638R4102 | SusC-like                               | 4.38  | 4.27  | 0.97  | 0.69  |
| BF638R4103 | outer membrane protein                  | 3.60  | 3.57  | 0.51  | 0.37  |
| BF638R4104 | endo-beta-galactosidase                 | 3.00  | 3.34  | 0.74  | 0.66  |
| BF638R4105 | beta-hexosaminidase precursor           | 2.15  | 1.40  | 0.18  | 0.17  |
| BF638R4106 | beta-glucanase                          | 1.99  | 1.88  | 0.49  | 0.44  |
| BF638R4107 | beta-galactosidase                      | 1.92  | 2.37  | 1.23  | 0.59  |
| BF638R4108 | SusC-like                               | 2.63  | 2.12  | 0.42  | 0.36  |
| BF638R4109 | outer membrane protein                  | 2.44  | 1.50  | 0.46  | 0.42  |
| BF638R4142 | glycosyl hydrolase                      | 2.02  | 1.68  | 0.52  | 0.52  |
| BF638R4143 | conserved hypothetical protein          | 1.71  | 0.96  | 0.30  | 0.28  |
| BF638R4144 | outer membrane protein                  | 2.27  | 0.84  | 0.48  | 0.42  |
| BF638R4145 | SusC-like                               | 2.75  | 1.19  | 0.37  | 0.23  |
| BF638R4146 | anti-sigma factor                       | 1.58  | 1.07  | 1.26  | 0.75  |
| BF638R4147 | ECF-type RNA polymerase sigma factor    | 0.80  | 0.72  | 0.33  | 0.36  |
| BF638R4192 | Transcriptional regulator               | 1.02  | 3.06  | 3.10  | 2.59  |
| BF638R4193 | SusC-like                               | 42.41 | 4.08  | 3.66  | 4.58  |
| BF638R4194 | lipoprotein                             | 32.61 | 3.23  | 1.83  | 2.95  |
| BF638R4207 | RNA polymerase ECF-type sigma factor    | 2.17  | 7.16  | 12.22 | 11.38 |
| BF638R4208 | anti-sigma factor                       | 8.54  | 2.29  | 5.73  | 2.32  |
| BF638R4209 | SusC-like                               | 57.11 | 32.97 | 8.14  | 3.80  |
| BF638R4210 | conserved hypothetical protein          | 24.09 | 9.37  | 2.59  | 2.31  |
| BF638R4247 | conserved hypothetical protein          | 1.41  | 2.26  | 2.58  | 2.10  |
| BF638R4248 | possible xylosidase/arabinoxidase       | 1.71  | 2.17  | 2.75  | 2.22  |
| BF638R4249 | conserved hypothetical exported protein | 2.03  | 1.70  | 4.03  | 4.00  |
| BF638R4250 | outer membrane protein                  | 1.59  | 1.20  | 3.79  | 2.11  |
| BF638R4251 | SusC-like                               | 2.29  | 1.88  | 4.90  | 2.51  |
| BF638R4258 | hypothetical protein                    | 1.46  | 0.52  | 0.20  | 0.19  |
| BF638R4259 | outer membrane protein                  | 2.76  | 1.06  | 0.73  | 0.46  |
| BF638R4260 | SusC-like                               | 3.79  | 1.46  | 0.83  | 0.70  |

|                 |                                             |      |      |       |      |
|-----------------|---------------------------------------------|------|------|-------|------|
| BF638R4261      | two-component system sensor kinase/resp     | 0.89 | 5.25 | 3.59  | 2.53 |
| BF638R4328      | SusC-like                                   | 1.91 | 1.69 | 0.17  | 0.19 |
| BF638R4329      | conserved hypothetical protein              | 1.69 | 1.29 | 0.18  | 0.19 |
| BF638R4330      | SusC-like                                   | 8.45 | 1.79 | 0.35  | 0.17 |
| BF638R4331      | outer membrane protein                      | 6.52 | 1.39 | 0.40  | 0.17 |
| BF638R4332      | hypothetical protein                        | 5.68 | 1.11 | 1.07  | 1.36 |
| BF638R4338      | SusC-like                                   | 2.02 | 1.03 | 0.12  | 0.14 |
| BF638R4339      | conserved hypothetical protein              | 2.18 | 1.09 | 0.12  | 0.14 |
| BF638R4348      | conserved hypothetical protein              | 0.93 | 0.86 | 1.30  | 1.18 |
| BF638R4349      | arylsulfatase                               | 1.14 | 0.52 | 1.32  | 1.63 |
| BF638R4350;BF6: | conserved hypothetical protein; lipoprotein | 1.24 | 0.53 | 1.10  | 1.81 |
| BF638R4352      | SusC-like                                   | 1.24 | 0.42 | 1.10  | 1.61 |
| BF638R4353      | anti-sigma factor                           | 1.21 | 0.28 | 12.51 | 9.78 |
| BF638R4354      | ECF-type RNA polymerase                     | 0.95 | 1.05 | 2.02  | 3.62 |
| BF638R4442      | outer membrane protein                      | 1.00 | 1.00 | 1.00  | 1.00 |
| BF638R4443      | SusC-like                                   | 2.59 | 2.06 | 0.41  | 0.36 |
| BF638R4444      | lipoprotein                                 | 0.65 | 0.46 | 0.15  | 0.21 |
| BF638R4478      | hypothetical protein                        | 2.23 | 2.84 | 1.45  | 2.03 |
| BF638R4479      | outer membrane protein                      | 4.48 | 4.32 | 0.95  | 0.72 |
| BF638R4480      | SusC-like                                   | 4.99 | 5.82 | 1.57  | 1.04 |
| BF638R4481      | hypothetical protein                        | 2.09 | 1.35 | 1.07  | 0.70 |
| BF638R4482      | transmembrane sugar transporter             | 2.19 | 0.83 | 2.38  | 1.95 |

\*All values were calculated from the expression microarray data deposited at the NCBI GEO, accession # GSE53883. *B. fragilis* 638R cultures were grown in vitro in defined medium with either 0.4% glucose (DM-G) or 2% mucin glycans (DM-M), or grown in vivo in the rat tissue cage for 1 (D1), 4 (D4), or 8 (D8) days. Values given in columns C-F are the ratios (induction or repression) of the RMA normalized Log2 expression values obtained from at least two biological replicates. The table rows are color coded according to which expression cluster the PUL is associated (see below). Genes associated with sialic acid utilization but not part of a recognized PUL are not color coded and remain uncolored.

Cluster 1: highly induced

Cluster 2: moderately induced or no change

Cluster 3: repressed following moderate induction on day 1

Cluster 4: repressed

Table S2. Proteomics Analysis of Rat Serous Fluid: Estimate of Relative Protein Abundance<sup>1</sup>

| Identified Proteins <sup>2</sup> | Mol Wt  | % of Total Protein <sup>3</sup> | g/dL <sup>4</sup> | Glycosylation sites <sup>5</sup> |
|----------------------------------|---------|---------------------------------|-------------------|----------------------------------|
| Serum albumin                    | 69 kDa  | 26%                             | 1.69              | 0                                |
| Serotransferrin                  | 76 kDa  | 7.00%                           | 0.45              | 1                                |
| Murinoglobulin-2                 | 162 kDa | 1.96%                           | 0.32              | 11                               |
| Alpha-1-inhibitor 3              | 164 kDa | 1.50%                           | 0.10              | 13                               |
| Protein LOC297568                | 164 kDa | 1.50%                           | 0.10              | 0                                |
| Murinoglobulin-1                 | 165 kDa | 1.40%                           | 0.09              | 13                               |
| Hemopexin                        | 51 kDa  | 1.30%                           | 0.08              | 5                                |
| Complement C3                    | 186 kDa | 1.30%                           | 0.08              | 2                                |
| Alpha-1-antiproteinase           | 46 kDa  | 1.20%                           | 0.08              | 3                                |
| Serine protease inhibitor A3I    | 47 kDa  | 1.20%                           | 0.08              | 4                                |
| Protein LOC299282                | 68 kDa  | 1.10%                           | 0.07              | 0                                |
| Alpha-1-macroglobulin            | 167 kDa | 1.00%                           | 0.06              | 11                               |
| Serine protease inhibitor A3L    | 46 kDa  | 1.00%                           | 0.06              | 4                                |
| Complement C4                    | 192 kDa | 0.65%                           | 0.04              | 5                                |
| Ceruloplasmin                    | 121 kDa | 0.64%                           | 0.04              | 6                                |

<sup>1</sup> Determined by Q-Exactive Orbitrap Mass Spectrometry at the UC Davis Proteomics Core Facility. Uninfected serous fluid was subject to SDS-PAGE, digested with trypsin (in-gel), extracted and analyzed by LC-MS/MS.

<sup>2</sup> The 15 most abundant proteins are shown and account for about 50% of total protein spectra observed.

<sup>3</sup> Estimated from the % of the total number of spectra observed for each protein

<sup>4</sup> Protein concentrations were estimated based on their respective percentage of total spectra relative to the total amount of protein concentration in the serous fluid (6.5 g/dL).

<sup>5</sup> The number of annotated N-glycosylations sites. These proteins have no annotated or predicted O-linked glycosylation.

Table S3. Bacterial strains and plasmids used in this study.

| Bacterial strain or plasmid | <sup>a</sup> Description                                                                                                                                                                                                                                 | Reference or source |
|-----------------------------|----------------------------------------------------------------------------------------------------------------------------------------------------------------------------------------------------------------------------------------------------------|---------------------|
| <i>Bacteroides</i> strains  |                                                                                                                                                                                                                                                          |                     |
| IB101                       | <i>B. fragilis</i> , 638R, clinical isolate, Rf <sup>f</sup>                                                                                                                                                                                             | (1)                 |
| IB102                       | <i>Bacteroides uniformis</i> , VPI strain 006-1 (ATCC8492), Rf <sup>f</sup>                                                                                                                                                                              | (2)                 |
| IB103                       | <i>Bacteroides ovatus</i> , VPI 0038 (ATCC 8483)                                                                                                                                                                                                         | (2)                 |
| IB114                       | <i>B. fragilis</i> , ATCC 25285, clinical isolate, Rf <sup>f</sup>                                                                                                                                                                                       | (3)                 |
| IB116                       | <i>Bacteroides thetaiotaomicron</i> , VPI strain 2302, Rf <sup>f</sup>                                                                                                                                                                                   | (2)                 |
| IB351                       | <i>Bacteroides vulgatus</i> , ATCC 8482                                                                                                                                                                                                                  | (2)                 |
| IB555                       | 638R $\Delta$ don, BF638R3439-3443 genes replaced with a <i>tetQ</i> cassette, Tc <sup>r</sup> , Rf <sup>f</sup>                                                                                                                                         | This study          |
| BT5482R                     | <i>Bacteroides thetaiotaomicron</i> , VPI strain 5482 (ATCC 29148), Rf <sup>f</sup>                                                                                                                                                                      | (4)                 |
| BER37                       | <i>Parabacteroides distasonis</i> , clinical isolate CLA348                                                                                                                                                                                              | (5)                 |
| BER39                       | <i>Parabacteroides merdae</i> , ATCC 43185                                                                                                                                                                                                               |                     |
| <i>E. coli</i> strains      |                                                                                                                                                                                                                                                          |                     |
| DH10B                       | <i>E. coli</i> , F <sup>-</sup> <i>mcrA</i> $\Delta$ ( <i>mrr-hsdRMS-mcrBC</i> ) $\Phi$ 80 <i>lacZ</i> $\Delta$ M15 $\Delta$ <i>lacX74</i> <i>recA1 endA1 araD139</i> $\Delta$ ( <i>ara leu</i> ) 7697 <i>galJ galK rpsL nupG</i> $\lambda$ <sup>-</sup> | Invitrogen          |
| HB101::RK231                | <i>E. coli</i> , HB101 containing RK231, Kn <sup>r</sup> , Tc <sup>r</sup> , Sm <sup>r</sup>                                                                                                                                                             | (6)                 |
| Plasmids                    |                                                                                                                                                                                                                                                          |                     |
| pFD516                      | <i>Bacteroides</i> suicide vector, 7.7 kb, Sp <sup>r</sup> in <i>E. coli</i> , Em <sup>r</sup> in <i>Bacteroides</i>                                                                                                                                     | (7)                 |
| pFD516/omp117 $\pm$ 2K/tetQ | pFD516 containing the BF638R3439-3443 deletion construct with the <i>tetQ</i> gene cassette, 14.6 kb, Sp <sup>r</sup> in <i>E. coli</i> , Em <sup>r</sup> and Tc <sup>r</sup> in <i>Bacteroides</i> .                                                    | This study          |

<sup>a</sup> Rf, rifampicin; Tc, tetracycline; Sp, spectinomycin; Em, erythromycin; Kn, kanamycin; Sm, streptomycin.

## REFERENCES

1. Privitera G, Dublanchet A, & Sebald M (1979) Transfer of multiple antibiotic resistance between subspecies of *Bacteroides fragilis*. *J.Infect.Dis.* 139:97-101.
2. Johnson JL (1978) Taxonomy of the bacteroides. I. Deoxyribonucleic acid homologies among *Bacteroides fragilis* and other saccharolytic *Bacteroides* species. *Int.J.Syst.Bacteriol.* 28:245-256.
3. Sund CJ, et al. (2008) The *Bacteroides fragilis* Transcriptome Response To Oxygen and H2O2: The Role Of OxyR And Its Effect On Survival And Virulence. *Mol.Microbiol.* 67:129-142.
4. Bedzyk L, Shoemaker NB, Young KE, & Salyers AA (1992) Insertion and excision of *Bacteroides* conjugative chromosomal elements. *J.Bacteriol.* 174:166-172.
5. Jacobs MR, Spangler SK, & Appelbaum PC (1990) Beta-lactamase production, beta-lactam sensitivity and resistance to synergy with clavulanate of 737

*Bacteroides fragilis* group organisms from thirty-three US centres. *J.Antimicrob. Chemother.* 26(3):361-370.

6. Guiney DG, Hasegawa P, & Davis CE (1984) Plasmid transfer from *Escherichia coli* to *Bacteroides fragilis*: differential expression of antibiotic resistance phenotypes. *Proc.Natl.Acad.Sci.USA* 81:7203-7206.
7. Smith CJ, Rollins LA, & Parker AC (1995) Nucleotide sequence determination and genetic analysis of the *Bacteroides* plasmid, pBI143. *Plasmid* 34:211-222.

**Table S4. Preparation of porcine gastric mucin glycans.**

| Procedure <sup>a,b</sup>                                                                                                                                      |
|---------------------------------------------------------------------------------------------------------------------------------------------------------------|
| 1. Suspend 2.5% (w/v) of Porcine gastric mucin (Type II, Sigma-Aldrich, Inc.) in 100 mM Tris Buffer (pH7.4) and autoclave for 5 min.                          |
| 2. Cool mixture to 65 °C and incubate with proteinase K (0.1mg/ml) at 65 °C for 16 to 20 h.                                                                   |
| 3. Centrifuge mixture at 21,000 g for 30 min at 4 °C.                                                                                                         |
| 4. Collect supernatant, add NaOH and NaBH <sub>4</sub> to final concentrations of 0.1 M and 1.0 M respectively.                                               |
| 5. Incubate reaction mixture at 55 °C for 20 hours.                                                                                                           |
| 6. Neutralize mixture to pH7.0 by the addition of HCl.                                                                                                        |
| 7. Centrifuge at 21,000 g for 30 min at 4 °C.                                                                                                                 |
| 8. Collect supernatant and filter through a 0.22 µm filter. Extensively dialyze filtrate against deionized distilled water with 1 kDa cutoff dialysis tubing. |
| 9. Lyophilize and store dry until needed.                                                                                                                     |

<sup>a</sup>Adapted from the Supplemental Experimental Procedures of Martens et al. 2008, Cell Host & Microbe 4:447-457

<sup>b</sup>Although optimized for the release of O-linked glycans, the procedure does liberate some N-linked glycans as shown previously (Supplemental Data Table S1, Martens et al. 2008, Cell Host & Microbe 4:447-457).



Table S5. Oligonucleotides used in this study.

| Name        | Sequence (5' → 3')               | Tag   | Description                                                                                         |
|-------------|----------------------------------|-------|-----------------------------------------------------------------------------------------------------|
| UF          | AGTCCTGCAGCAAACAGATGCCTTATCAGTTT | PstI  | Designed to amplify 2 kb upstream of <i>donC</i>                                                    |
| UR          | AGTCGGATCCCAGTGTCTTATCCAGAGATTCA | BamHI |                                                                                                     |
| DF          | AGTCGGATCCCTGGACAATATCGATTCAAGCA | BamHI | Designed to amplify 2 kb downstream for <i>donG</i>                                                 |
| DR          | AGTCGAGCTCATAGCGACCAAAACCC TTCT  | SacI  |                                                                                                     |
| Omp117rtL   | GGTGAAGGCATTTCCGACTT             |       | Designed to amplify a 140 bp fragment of <i>donC</i> gene for quantitative PCR                      |
| Omp117rtR   | TTGCCTTCCTGCCCTTTCTT             |       |                                                                                                     |
| 16srL       | GATGCGTTCCATTAGGTTGTTG           |       | Designed to amplify a 127 bp fragment of 16s ribosomal RNA gene for quantitative PCR                |
| 16srR       | CACTGCTGCCTCCCGTAG               |       |                                                                                                     |
| PsigOKL2    | AATCACAATCAGCCTTATATTCTAC        |       | Designed to amplify a 375 bp fragment spanning <i>donA</i> and its potential TIS region             |
| PsigOKR     | CATTGCTCCTGATAGGTCTG             |       |                                                                                                     |
| PantisigOKL | GGATATTTTCGATCCGCACTG            |       | Designed to amplify a 298 bp fragment spanning the intergenic region of <i>donA</i> and <i>donB</i> |
| PantisigOKR | TTTCCTTCGGTTTCGTTCCA             |       |                                                                                                     |
| Pomp117L    | AGATATCCTGAACATTATGCAGG          |       | Designed to amplify a 339 bp fragment spanning the intergenic region of <i>donB</i> and <i>donC</i> |
| Pomp117R    | GCCGTTTGTAGAATAAAACAGC           |       |                                                                                                     |
| PsusDL      | AATGACCTCTTCGACAGGTA             |       | Designed to amplify a 220 bp fragment spanning the intergenic region of <i>donC</i> and <i>donD</i> |
| PsusDR      | GGTTCCGGTTGATATCTTCG             |       |                                                                                                     |
| PendoSL     | ATTGATCGGAAACGGATACG             |       | Designed to amplify a 240 bp fragment spanning the intergenic region of <i>donD</i> and <i>donE</i> |
| PendosR     | CTACCAACAATGCTACTCCG             |       |                                                                                                     |
| PsusEL      | GAAGACGCATTTGAAGACGA             |       | Designed to amplify a 261 bp fragment spanning the intergenic region of <i>donE</i> and <i>donF</i> |
| PsusER      | GCTCTAAAGTGAAGTTGACGA            |       |                                                                                                     |
| PsusFL      | GAGACCAAAGACCTGAAAGC             |       | Designed to amplify a 288 bp fragment spanning the intergenic region of <i>donF</i> and <i>donG</i> |
| PsusFR      | GAGTTGCTCACGGATATCTT             |       |                                                                                                     |
